# Supplementary material
Source: Copernicus journal article supplement (doi:10.5194/piahs-388-33-2026)
Supplement: Supplementary file 1 [file piahs-388-33-2026-supplement.pdf]

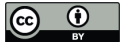

*Supplement of*

## **Spatiotemporal analysis of meteorological and hydrological droughts across the Beninese part of the Niger River Basin (West Africa)**

**Orou Moctar Ganni Mampo et al.**

*Correspondence to:* Orou Moctar Ganni Mampo (moctarganni@gmail.com)

The copyright of individual parts of the supplement might differ from the article licence.

## Station data used

**Table S1:** Rainfall and streamflow stations used

| Station<br>Rainfall (P) | Country      | Longitude<br>(°) | Latitude (°) | Annual<br>Rainfall<br>[mm] | Rainfall<br>Apr-Oct<br>[mm] |
|-------------------------|--------------|------------------|--------------|----------------------------|-----------------------------|
| Alfakoara (P1)          | Benin        | 3.07             | 11.45        | 908                        | 901                         |
| Banikoara (P2)          | Benin        | 2.43             | 11.3         | 974                        | 964                         |
| Bembereke (P3)          | Benin        | 2.67             | 10.2         | 1084                       | 1060                        |
| Djougou (P4)            | Benin        | 1.67             | 9.7          | 1179                       | 1128                        |
| Fada Ngourma (P5)       | Burkina Faso | 0.37             | 12.05        | 800                        | 789                         |
| Gaya (P6)               | Niger        | 3.45             | 11.88        | 820                        | 817                         |
| Ina (P7)                | Benin        | 2.73             | 9.97         | 1094                       | 1055                        |
| Kalale (P8)             | Benin        | 3.38             | 10.3         | 1087                       | 1065                        |
| Kandi (P9)              | Benin        | 2.93             | 11.13        | 1039                       | 988                         |
| Karimama (P10)          | Benin        | 3.18             | 12.07        | 696                        | 691                         |
| Kouande (P11)           | Benin        | 1.68             | 10.33        | 1170                       | 1131                        |
| Malanville (P12)        | Benin        | 3.4              | 11.87        | 806                        | 797                         |
| Natitingou (P13)        | Benin        | 1.38             | 10.32        | 1194                       | 1158                        |
| Niamey (P14)            | Niger        | 2.1              | 13.52        | 530                        | 528                         |
| Nikki (P15)             | Benin        | 3.2              | 9.93         | 1052                       | 1008                        |
| Parakou (P16)           | Benin        | 2.6              | 9.35         | 1162                       | 1102                        |
| Segbana (P17)           | Benin        | 3.7              | 10.93        | 1008                       | 996                         |
| Tanguieta (P18)         | Benin        | 1.27             | 10.62        | 1030                       | 1002                        |

  

| Streamflow (D) | Country | Longitude<br>(°) | Latitude (°) | Mean<br>streamflow<br>[m <sup>3</sup> /s] |
|----------------|---------|------------------|--------------|-------------------------------------------|
| Couberi (D1)   | Benin   | 3.35             | 11.75        | 39.4                                      |
| Yankin (D2)    | Benin   | 2.65             | 11.15        | 33.3                                      |
| Kompongou (D3) | Benin   | 2.20             | 11.40        | 28.7                                      |

Illustrating the hydrological and rainfall datasets used

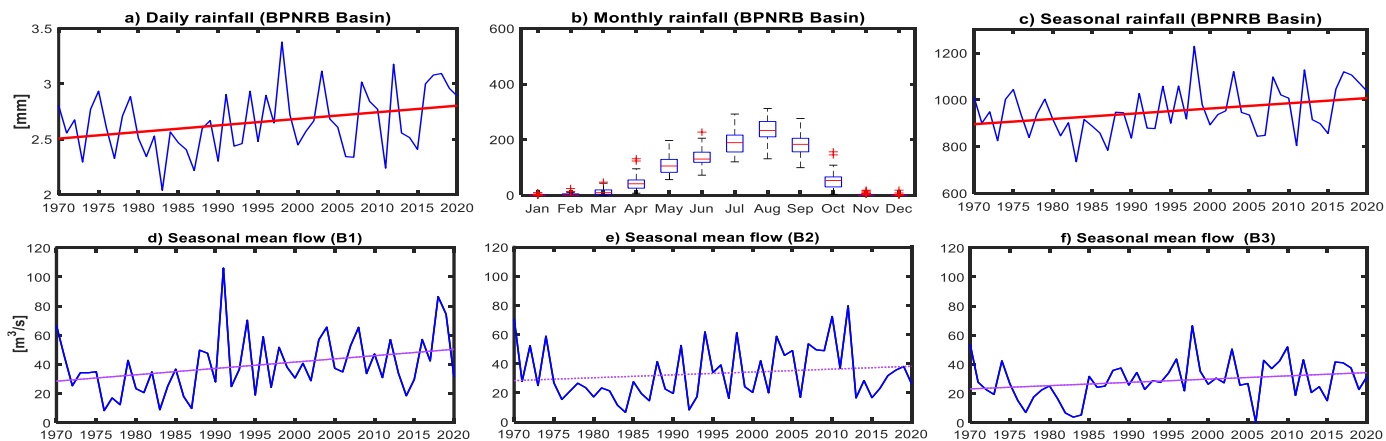

**Figure S1:** The hydrological and rainfall datasets used a) Daily catchment rainfall, b) Monthly catchment rainfall, c) Seasonal rainfall, d) Seasonal mean flow for hydrological station B1 (Sota

subbasin), e) Seasonal mean flow for hydrological station B2 (Alibori subbasin) and d) Seasonal mean flow for hydrological station B3 (Mekrou subbasin).

### Filling of data gaps in the streamflow time series

We used the hydrological model ModHyPMA to fill the data gaps in streamflow observations for the three catchments. ModHyPMA consists of a production function and a transfer function (Afouda A., 2004; Alamous E., 2011). The catchment response is controlled by two parameters, a non-linearity parameter and the basin drying coefficient. The model has been calibrated and validated for both wet and dry periods, demonstrating its ability to accurately distinguish between these two hydrological conditions. For all three catchments, a good model performance has been found with  $R^2$  (coefficient of determination) and NSE (Nash Sutcliff Efficiency) values in the range of 0.56–0.73 and 0.56–0.60, respectively, for the validation periods (Table S2).

**Table S2:** Performance of the ModHyPMA model for calibration and validation periods.

| Catchment | Calibration      |       | Validation |                  |       |      |
|-----------|------------------|-------|------------|------------------|-------|------|
|           | Period           | $R^2$ | NSE        | Period           | $R^2$ | NSE  |
| <b>B1</b> | <b>1986-1989</b> | 0.78  | 0.74       | <b>2003-2007</b> | 0.73  | 0.56 |
| <b>B2</b> | <b>1984-1987</b> | 0.64  | 0.63       | <b>2005-2008</b> | 0.66  | 0.60 |
| <b>B3</b> | <b>1971-1974</b> | 0.84  | 0.83       | <b>2007-2010</b> | 0.56  | 0.59 |

#### - Temperature data used in the PET calculation

The mean temperature used over the period 1970-2020 was obtained from climate station P9 which is centrally located in the study area (Fig. 1).

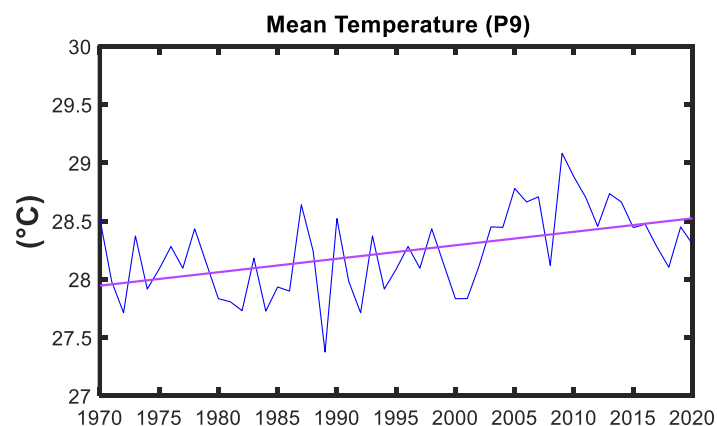

**Figure S2:** Mean temperature of the rainy season at Kandi station (P9, see Fig. 1) for the period 1970–2020. The linear trend is significant at 5%.

**Table S3:** Results of the trends test on the SPI, SPEI, CDD and SDI values

| Indices   | Stations          | Tau Value | Sen's slope | P_Value  |
|-----------|-------------------|-----------|-------------|----------|
| SPI-3**   | Spm over<br>BPNRB | 6.11E-02  | 3.37E-04    | 2.87E-01 |
| SPI-6*    | Spm over<br>BPNRB | 9.60E-02  | 5.22E-04    | 1.14E-02 |
| SPI-12*   | Spm over<br>BPNRB | 1.53E-01  | 7.94E-04    | 4.81E-03 |
| SPEI-3*   | Spm over<br>BPNRB | -1.20E-01 | -6.47E-04   | 2.76E-03 |
| SPEI-6*   | Spm over<br>BPNRB | -1.19E-01 | -5.77E-04   | 2.03E-02 |
| SPEI-12** | Spm over<br>BPNRB | -3.60E-04 | -7.85E-02   | 1.02E-01 |
| CDD       | Alfakoara**       | 0.132     | 0.3333      | 0.252    |
|           | Banikoara**       | 0.125     | 0.4000      | 0.199    |
|           | Bembereke**       | -0.111    | -0.1106     | 0.255    |
|           | Djougou**         | 0.090     | 0.3529      | 0.528    |
|           | Fada**            | 0.015     | 0.0526      | 0.900    |
|           | Gaya**            | -0.106    | -0.3571     | 0.276    |
|           | Ina**             | -0.074    | -0.2083     | 0.450    |
|           | Kalale**          | 0.117     | 0.3158      | 0.232    |
|           | Kandi**           | 0.045     | 0.1429      | 0.649    |
|           | Karimama**        | 0.086     | 0.3846      | 0.656    |
|           | Kouande**         | 0.027     | 0.0698      | 0.789    |
|           | Malanville**      | -0.140    | -0.4444     | 0.150    |
|           | Natitingou**      | 0.028     | 0.08        | 0.776    |
|           | Niamey**          | -0.113    | -0.3182     | 0.249    |
|           | Nikki**           | -0.106    | -0.3810     | 0.280    |
| Parakou** | 0.008             | 0.04      | 0.942       |          |

|        |              |        |        |          |
|--------|--------------|--------|--------|----------|
|        | Segbana**    | 0.176  | 0.6957 | 0.071    |
|        | Tanguieta*   | 0.292  | 0.8889 | 0.0002   |
| CDDinR | Alfakoara**  | 0.147  | 0.050  | 0.129    |
|        | Banikoara**  | -0.071 | 0.000  | 0.461    |
|        | Bembereke**  | -0.044 | 0.000  | 0.652    |
|        | Djougou**    | 0.024  | 0.000  | 0.805    |
|        | Fada**       | 0.153  | 0.050  | 0.113    |
|        | Gaya**       | -0.011 | 0.000  | 0.915    |
|        | Ina**        | -0.007 | 0.000  | 0.948    |
|        | Kalale*      | 0.201  | 0.057  | 0.019    |
|        | Kandi**      | -0.055 | 0.000  | 0.570    |
|        | Karimama**   | 0.166  | 0.143  | 0.222    |
|        | Kouande**    | 0.087  | 0.000  | 0.368    |
|        | Malanville** | -0.135 | -0.067 | 0.043    |
|        | Natitingou** | -0.010 | 0.000  | 0.921    |
|        | Niamey**     | -0.005 | 0.000  | 0.968    |
|        | Nikki**      | 0.112  | 0.029  | 0.322    |
|        | Parakou**    | 0.038  | 0.000  | 0.481    |
|        | Segbana**    | 0.033  | 0.000  | 0.737    |
|        | Tanguieta**  | 0.120  | 0.030  | 0.213    |
| SDI-3  | Gbasse*      | 0.191  | 0.0016 | 3.83E-03 |
|        | Couberi**    | 0.130  | 0.0011 | 5.03E-02 |
|        | Yankin*      | 0.212  | 0.0017 | 3.41E-03 |
|        | Kompongou**  | 0.143  | 0.0011 | 8.89E-02 |
| SDI-6  | Gbasse*      | 0.287  | 0.0024 | 3.33E-08 |
|        | Couberi*     | 0.214  | 0.0018 | 9.55E-04 |
|        | Yankin*      | 0.199  | 0.0017 | 8.82E-03 |
|        | Kompongou*   | 0.184  | 0.0015 | 3.74E-02 |
|        | Gbasse*      | 0.380  | 0.0033 | 2.93E-16 |

|        |            |       |        |          |
|--------|------------|-------|--------|----------|
| SDI-12 | Couberi*   | 0.306 | 0.0026 | 2.20E-05 |
|        | Yankin**   | 0.174 | 0.0016 | 7.35E-02 |
|        | Kompongou* | 0.209 | 0.0016 | 1.01E-02 |

---

\* Significant trend, \*\* No Significant trend, Spm= Spatial mean
